# Supplementary material for: Primary tumor immune score fails to predict the prognosis of colorectal cancer liver metastases after hepatectomy in Chinese populations
Source: PubMed Central journal article supplement — Ann Transl Med. 2021 Feb;9(4):310. doi: 10.21037/atm-20-4932 (PMC7944305; doi:10.21037/atm-20-4932), 2021-02
Supplement: atm-09-04-310-rc.pdf [file atm-09-04-310-rc.pdf]

## TRIPOD Checklist: Prediction Model Development

| Section                   | Item | Checklist description                                                                                                                                                                            | Reported on Page Number/Line Number                                  | Reported on Section/Paragraph                                  |
|---------------------------|------|--------------------------------------------------------------------------------------------------------------------------------------------------------------------------------------------------|----------------------------------------------------------------------|----------------------------------------------------------------|
| <b>Title and abstract</b> |      |                                                                                                                                                                                                  |                                                                      |                                                                |
| Title                     | 1    | Identify the study as developing and/or validating a multivariable prediction model, the target population, and the outcome to be predicted.                                                     | Page 2/Line 29-35                                                    | Abstract/Para 1                                                |
| Abstract                  | 2    | Provide a summary of objectives, study design, setting, participants, sample size, predictors, outcome, statistical analysis, results, and conclusions.                                          | Page 2-3/Line 36-53                                                  | Abstract/Para 2-4                                              |
| <b>Introduction</b>       |      |                                                                                                                                                                                                  |                                                                      |                                                                |
| Background and objectives | 3a   | Explain the medical context (including whether diagnostic or prognostic) and rationale for developing or validating the multivariable prediction model, including references to existing models. | Page 3-4/Line 58-79                                                  | Introduction/Para 1-2                                          |
|                           | 3b   | Specify the objectives, including whether the study describes the development or validation of the model or both.                                                                                | Page 4/Line 80-83                                                    | Introduction/Para 3                                            |
| <b>Methods</b>            |      |                                                                                                                                                                                                  |                                                                      |                                                                |
| Source of data            | 4a   | Describe the study design or source of data (e.g., randomized trial, cohort, or registry data), separately for the development and validation data sets, if applicable.                          | Page 5/Line 86-100                                                   | Materials and methods/Para 1                                   |
|                           | 4b   | Specify the key study dates, including start of accrual; end of accrual; and, if applicable, end of follow-up.                                                                                   | Page 6-7/Line 124-140                                                | Materials and methods/Para 3                                   |
| Participants              | 5a   | Specify key elements of the study setting (e.g., primary care, secondary care, general population) including number and location of centres.                                                     | Page 5/Line 88-100<br>Page 7-8/Line 142-156<br>Page 8-9/Line 158-179 | Materials and methods/Para 1<br>Materials and methods/Para 4-5 |
|                           | 5b   | Describe eligibility criteria for participants.                                                                                                                                                  | Page 5/Line 90-96                                                    | Materials and methods/Para 1                                   |
|                           | 5c   | Give details of treatments received, if relevant.                                                                                                                                                | Page 5-6/Line 101-121                                                | Materials and methods/Para 2                                   |
| Outcome                   | 6a   | Clearly define the outcome that is predicted by the prediction model, including how and when assessed.                                                                                           | Page 8-9/Line 158-179                                                | Materials and methods/Para 5                                   |
|                           | 6b   | Report any actions to blind assessment of the outcome to be predicted.                                                                                                                           | Page 8/Line 166-168                                                  | Materials and methods/Para 5                                   |
| Predictors                | 7a   | Clearly define all predictors used in developing or validating the multivariable prediction model, including how and when they were measured.                                                    | Page 10/Line 205-211                                                 | Materials and methods/Para 8                                   |
|                           | 7b   | Report any actions to blind assessment of predictors for the outcome and other predictors.                                                                                                       | Page 10/Line 205-211                                                 | Materials and methods/Para 8                                   |
| Sample size               | 8    | Explain how the study size was arrived at.                                                                                                                                                       | Page 5/Line 86-100                                                   | Materials and methods/Para 1                                   |

|                              |     |                                                                                                                                                                                                       |                                                                                                                                                                           |                                                              |
|------------------------------|-----|-------------------------------------------------------------------------------------------------------------------------------------------------------------------------------------------------------|---------------------------------------------------------------------------------------------------------------------------------------------------------------------------|--------------------------------------------------------------|
| Missing data                 | 9   | Describe how missing data were handled (e.g., complete-case analysis, single imputation, multiple imputation) with details of any imputation method.                                                  | Page 6/Line 129-130                                                                                                                                                       | Materials and methods/Para 3                                 |
| Statistical analysis methods | 10a | Describe how predictors were handled in the analyses.                                                                                                                                                 | Page 9/Line 171-179<br>Page 9-10/Line 194-204                                                                                                                             | Materials and methods/Para 5<br>Materials and methods/Para 7 |
|                              | 10b | Specify type of model, all model-building procedures (including any predictor selection), and method for internal validation.                                                                         | Page 10/Line 205-211                                                                                                                                                      | Materials and methods/Para 8                                 |
|                              | 10d | Specify all measures used to assess model performance and, if relevant, to compare multiple models.                                                                                                   | Page 9-10/Line 194-204<br>Page 10/Line 226-228                                                                                                                            | Materials and methods/Para 7,11                              |
| Risk groups                  | 11  | Provide details on how risk groups were created, if done.                                                                                                                                             | N/A. The present study did not create risk groups.                                                                                                                        |                                                              |
| <b>Results</b>               |     |                                                                                                                                                                                                       |                                                                                                                                                                           |                                                              |
| Participants                 | 13a | Describe the flow of participants through the study, including the number of participants with and without the outcome and, if applicable, a summary of the follow-up time. A diagram may be helpful. | Page 12-13/Line 254-290<br>Table 1, 2                                                                                                                                     | Results/Para 1-6                                             |
|                              | 13b | Describe the characteristics of the participants (basic demographics, clinical features, available predictors), including the number of participants with missing data for predictors and outcome.    | Page 12-13/Line 254-263                                                                                                                                                   | Results/Para 1                                               |
| Model development            | 14a | Specify the number of participants and outcome events in each analysis.                                                                                                                               | Table 3, 4                                                                                                                                                                | Table 3,4                                                    |
|                              | 14b | If done, report the unadjusted association between each candidate predictor and outcome.                                                                                                              | Table 3,4                                                                                                                                                                 | Table 3,4                                                    |
| Model specification          | 15a | Present the full prediction model to allow predictions for individuals (i.e., all regression coefficients, and model intercept or baseline survival at a given time point).                           | Supplementary Table                                                                                                                                                       | Supplementary Table                                          |
|                              | 15b | Explain how to the use the prediction model.                                                                                                                                                          | N/A. The Cox regression model which included the immune score status of primary tumour fail to predict the postoperative survivals in patients underwent liver resection. |                                                              |
| Model performance            | 16  | Report performance measures (with CIs) for the prediction model.                                                                                                                                      | Page14-15/Line 292-316<br>Table 3, 4                                                                                                                                      | Results/Para 7,8<br>Table 3, 4                               |
| <b>Discussion</b>            |     |                                                                                                                                                                                                       |                                                                                                                                                                           |                                                              |
| Limitations                  | 18  | Discuss any limitations of the study (such as nonrepresentative sample, few events per predictor, missing data).                                                                                      | Page 19-20/Line 414-421                                                                                                                                                   | Discussion/Para 5                                            |
| Interpretation               | 19b | Give an overall interpretation of the results, considering objectives, limitations, and results from similar studies, and other relevant evidence.                                                    | Page 18/Line 350-358                                                                                                                                                      | Discussion/Para 1                                            |
| Implications                 | 20  | Discuss the potential clinical use of the model and implications for future research.                                                                                                                 | Page 19-20/Line 385-413                                                                                                                                                   | Discussion/Para 3,4                                          |
| <b>Other information</b>     |     |                                                                                                                                                                                                       |                                                                                                                                                                           |                                                              |

|                           |    |                                                                                                                               |                         |                                                                                 |
|---------------------------|----|-------------------------------------------------------------------------------------------------------------------------------|-------------------------|---------------------------------------------------------------------------------|
| Supplementary information | 21 | Provide information about the availability of supplementary resources, such as study protocol, Web calculator, and data sets. | Page 20-21/Line 446-451 | Data availability statements/Para 1<br>Compliance with Ethical Standards/Para 1 |
| Funding                   | 22 | Give the source of funding and the role of the funders for the present study.                                                 | Page 21/Line 459-462    | Funding/Para 1                                                                  |

Article information: <http://dx.doi.org/10.21037/atm-20-4932>

\*As the checklist was provided upon initial submission, the page number/line number reported may be changed due to copy editing and may not be referable in the published version. In this case, the section/paragraph may be used as an alternative reference.
