# Supplementary material for: Primary tumor immune score fails to predict the prognosis of colorectal cancer liver metastases after hepatectomy in Chinese populations
Source: PubMed Central journal article supplement — Ann Transl Med. 2021 Feb;9(4):310. doi: 10.21037/atm-20-4932 (PMC7944305; doi:10.21037/atm-20-4932), 2021-02
Supplement: atm-09-04-310-supplementary.pdf [file atm-09-04-310-supplementary.pdf]

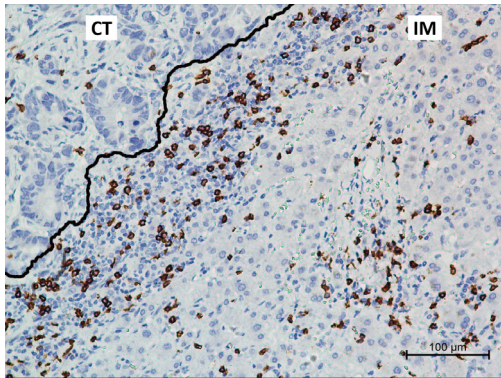

**Figure S1** Representative picture delineating the boundary of CT and IM area in a liver metastasis specimen. The black line representing the borderline between CT and IM area. (scale bar =100 μm). CT, core tumor; IM, invasive margin.

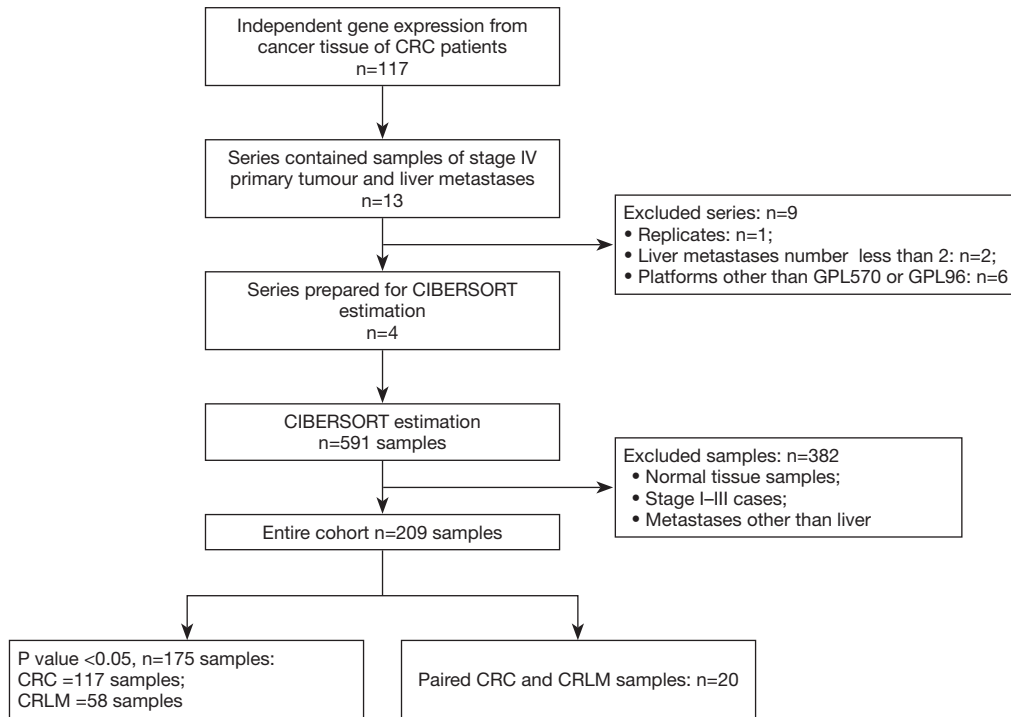

**Figure S2** Flowchart of GEO dataset collection and sample selection. GEO, Gene Express Omnibus.

**Table S1** Median densities and interquartile ranges of the four indexes of immune score in primary tumor and liver metastasis

| Indexes                      | Median densities of infiltrated lymphocytes (IQR) cells/mm <sup>2</sup> |                        |
|------------------------------|-------------------------------------------------------------------------|------------------------|
|                              | Primary tumor                                                           | liver metastases       |
| CD3 <sup>+</sup> cells in CT | 48.86 (0.00–172.64)                                                     | 16.13 (0.00–94.09)     |
| CD3 <sup>+</sup> cells in IM | 417.40 (62.20–1,066.04)                                                 | 300.00 (118.71–524.40) |
| CD8 <sup>+</sup> cells in CT | 22.80 (0.00–110.75)                                                     | 10.75 (0.00–83.33)     |
| CD8 <sup>+</sup> cells in IM | 302.20 (26.22–828.67)                                                   | 290.63 (149.02–419.56) |

CT, core tumor; IM, invasive margin; IQR, interquartile range.

**Table S2** Median densities and interquartile ranges of the four indexes in primary tumors according to patients clinicopathological characteristics

| Characteristics                  | Median density (IQR) cells/mm <sup>2</sup> |                              |                              |                              |
|----------------------------------|--------------------------------------------|------------------------------|------------------------------|------------------------------|
|                                  | CD3 <sup>+</sup> cells in CT               | CD3 <sup>+</sup> cells in IM | CD8 <sup>+</sup> cells in CT | CD8 <sup>+</sup> cells in IM |
| Synchronous metastases           |                                            |                              |                              |                              |
| Present                          | 50.49 (0.00–175.08)                        | 411.40 (77.31–1,049.43)      | 24.43 (0.00–112.38)          | 304.16 (30.92–846.88)        |
| Absent                           | 39.09 (0.00–169.38)                        | 459.18 (7.43–1,330.57)       | 9.77 (0.00–148.21)           | 123.97 (16.12–928.90)        |
| Preoperative chemotherapy status |                                            |                              |                              |                              |
| Yes                              | 97.72 (1.63–309.45)                        | 540.67 (150.04–1,190.09)     | 71.66 (17.92–294.79)         | 500.00 (87.46–1,151.66)      |
| No                               | 9.77 (0.00–140.07)                         | 268.56 (36.50–1,058.51)      | 6.51 (0.00–50.49)            | 159.44 (9.54–714.72)         |
| Primary tumor location           |                                            |                              |                              |                              |
| Right-sided                      | 26.06 (0.00–175.08)                        | 406.13 (77.31–976.46)        | 35.83 (0.00–86.32)           | 226.63 (13.17–699.14)        |
| Left-sided                       | 55.37 (0.00–175.90)                        | 459.18 (58.25–1,122.72)      | 19.54 (0.00–136.81)          | 348.12 (29.36–943.40)        |
| Resection status                 |                                            |                              |                              |                              |
| Synchronous resection            | 42.35 (0.00–201.95)                        | 394.87 (107.48–1,047.24)     | 22.80 (0.00–117.26)          | 295.77 (26.22–901.52)        |
| Heterochronous resection         | 55.37 (0.00–145.77)                        | 479.87 (32.77–1,128.26)      | 21.17 (0.00–109.12)          | 313.57 (24.12–815.42)        |

CT, core tumor; IM, invasive margin; IQR, interquartile range.

**Table S3** All regression coefficients in multivariate Cox regression analyses in *Tables 3,4*

| Characteristics                                                       | Regression coefficients |
|-----------------------------------------------------------------------|-------------------------|
| Age (>65 s vs. ≤65 years)                                             | 1.183                   |
| Gender (male vs. female)                                              | 1.664                   |
| BMI (≥24 vs. <24 kg/m <sup>2</sup> )                                  | 1.359                   |
| Primary tumor grade (G3 vs. G1–2)                                     | 1.260                   |
| Primary tumor location (right-sided vs. left-sided)                   | 1.771                   |
| T-stage (pT4 vs. pT1–3)                                               | 1.450                   |
| N-stage (pN1–2 vs. pN0)                                               | 1.611                   |
| Synchronous metastases (present vs. absent)                           | 1.130                   |
| Resection status (heterochronous vs. synchronous)                     | 0.458                   |
| Preoperative chemotherapy before primary tumor resection (yes vs. no) | 0.405                   |
| Immune score LM (high vs. low)                                        | 0.427                   |
| Immune score PT (high vs. low)                                        | 0.389                   |

BMI, body mass index; LM, liver metastases; PT, primary tumor.
